# Supplementary material for: Arabidopsis ABA-Activated Kinase MAPKKK18 is Regulated by Protein Phosphatase 2C ABI1 and the Ubiquitin–Proteasome Pathway
Source: PubMed Central journal article supplement — Plant Cell Physiol. 2015 Oct 6;56(12):2351–67. doi: 10.1093/pcp/pcv146 (PMC4675898; doi:10.1093/pcp/pcv146), 2015-10-06
Supplement: supp_pcv146_pcp-2015-e-00378-File012.pdf [file supp_pcv146_pcp-2015-e-00378-File012.pdf]

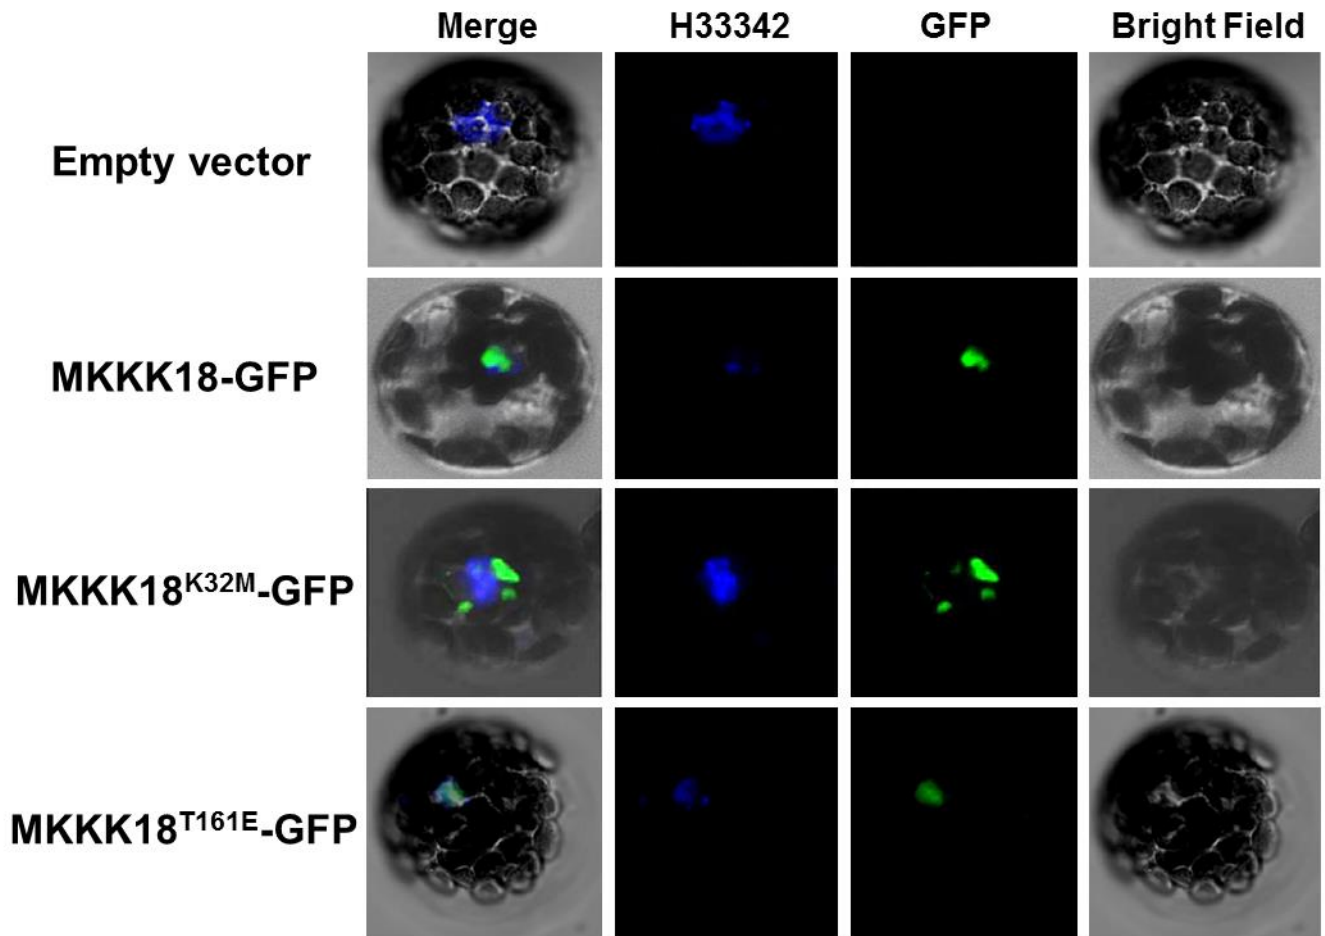

**Supplementary Figure S1. Subcellular localization of the MKKK18 protein in the *ab1td* protoplasts.**

Microscopy images show nuclear localization of the MKKK18-GFP fusions in protoplasts isolated from leaves of the *ab1td* mutant. Hoechst H33342 was employed to stain the nucleus. Empty pEarlygate 103 was used as negative control.

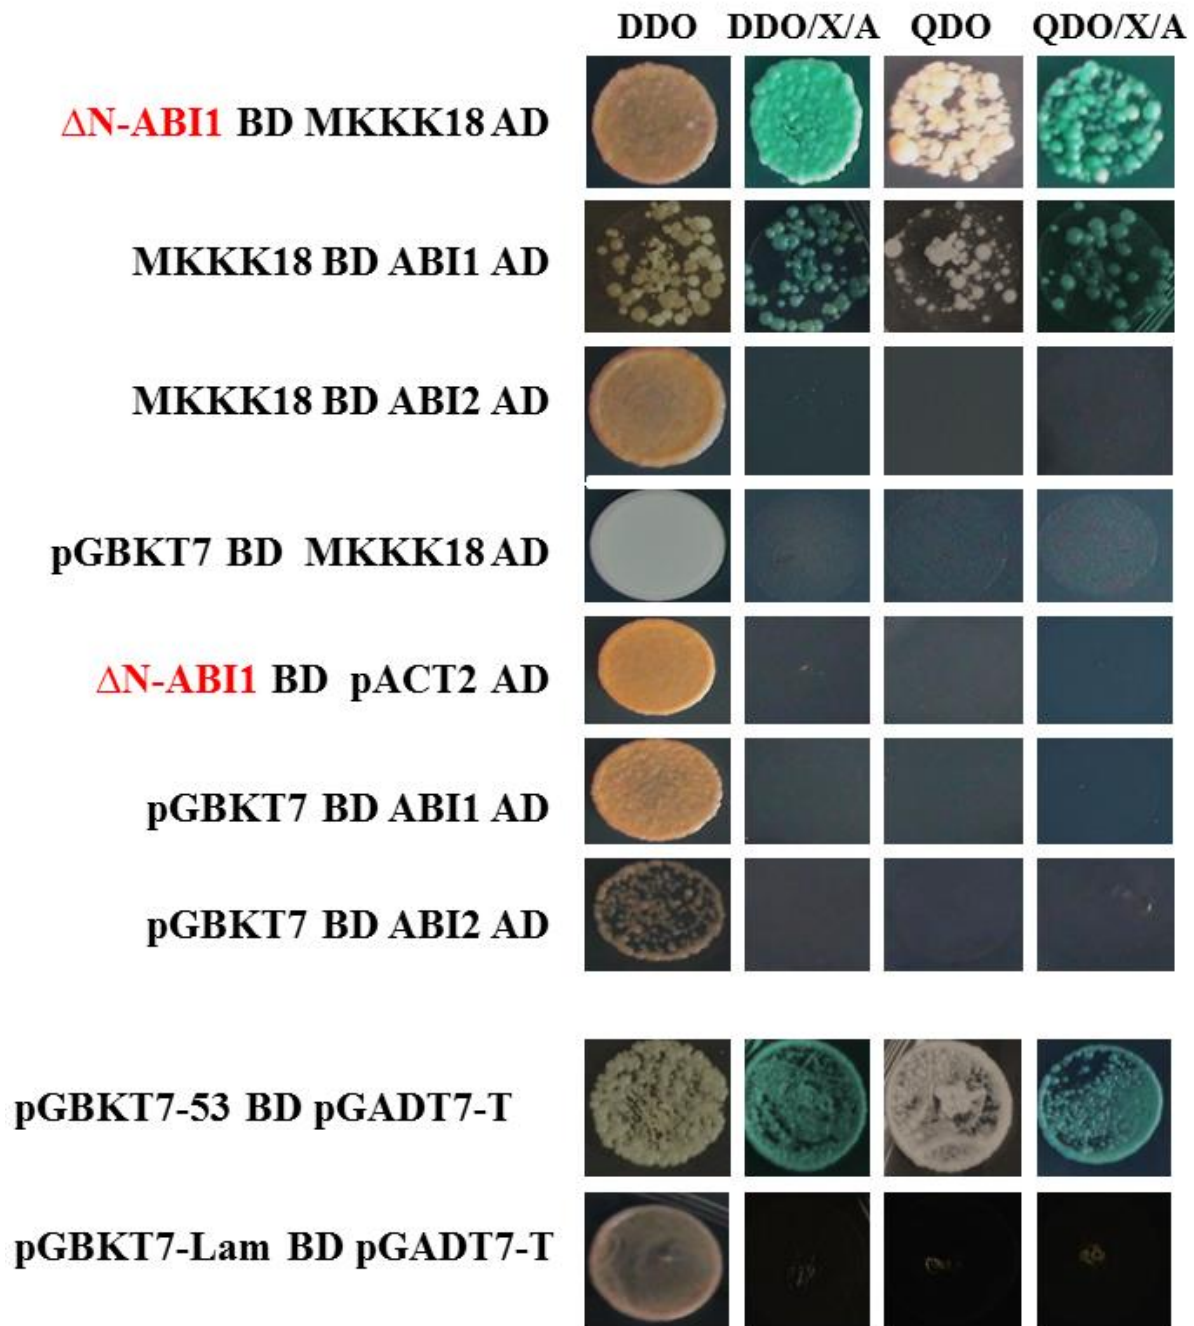

**Supplementary Figure S2.** Yeast two-hybrid analysis of the interaction between MKKK18 and ABI1/2 PP2Cs.

Diploid yeast colonies were grown on double (DDO-SD medium without Leu and Trp) or quadruple selective medium (QDO-SD medium without Leu, Trp, His, or Ade) with or without supplemented X-alpha-Gal and *aureobasidin*. The bait (MKKK18) did not autoactivate the reporter genes in yeast. Interactions between p53 or Lam and T proteins were used as positive control and negative control, respectively. **Abbreviations:** BD binding domain, AD-activation domain,  $\Delta$ N-ABI1 – the N-terminal deletion of ABI1.

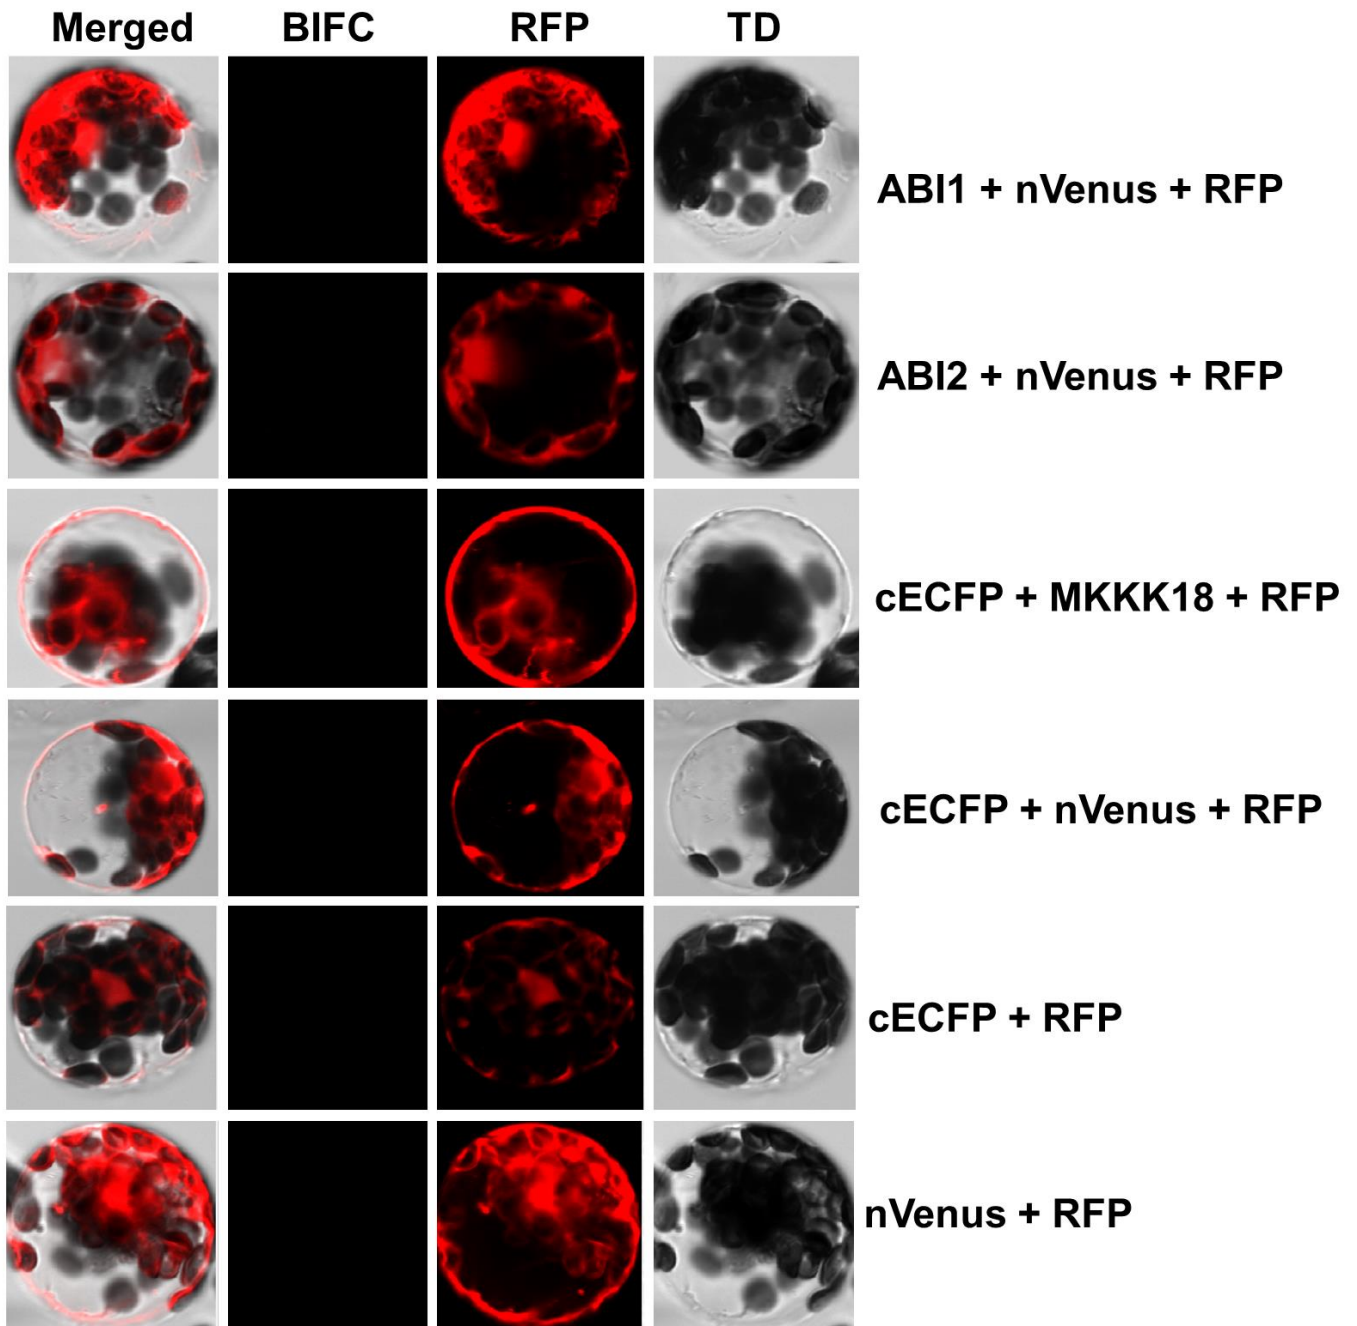

**Supplementary Figure S3. Negative controls in BiFC experiment.**

The negative controls in BiFC analysis were conducted by cotransfecting free ECFP or nVenus fragments together with complementary full length proteins that resulted in no detectable signals. RFP was used as a transformation control.

## Supplementary Methods S1. BiFC vector construction

Expression cassettes from pSITEII-4C1 and pSITEII-7N1 (Martin et al., 2009) were PCR amplified using the primers CasF (5'-TAGCTGTTTGCCAACCGGTCAAC-3'), and to avoid double digest of the PCR product with NotI, we used the primer CasPspR (5'-ATAGGGCCCCGTCCTGGATTTTGGTT-3') which changed the NotI site for PspOMI at the 3'-end. PCR products were digested with AgeI and PspOMI (Thermo Scientific). The cassette from pSITEII-4C1 was cloned into the vector pAUX3169 (Goderis et al., 2002) and digested with AgeI and NotI (Thermo Scientific), and the cassette from pSITEII-7N1 was cloned into the vector pAUX3132 (Goderis et al., 2002), giving pSAT3-Venus-DEST and pSAT5-DEST-Dendra2 (nomenclature consistent with Tzfira et al., 2005), respectively. Sequence coding for the C-terminal part of eCFP (aa 155-239) was PCR amplified with the primers CpolFseF (5'-AATGGCCGGCCATGGACAAGCAGAAGA-3') and CpolSpeR (5'-CCCGACTAGTCTTGTACAGCTCGTC-3') using pSITE-1CA (Chakrabarty et al., 2007) as the matrix. Primers NpolFseF (5'-ATTGGCCGGCCATGGTGAGCAAGGGC-3') and NpolSpeR (5'-ATTACTAGTCTCGATGTTGTGGCG-3') were used to amplify sequences coding for the N-terminal part of Cerulean and Venus (aa 1-173) from pSITEII-2C1 and pSITEII-4C1 (Martin et al., 2009), respectively. All PCR products were digested using a restriction pair FseI-SpeI (NEB) and subcloned into pSAT3-Venus-DEST and pSAT5-DEST-Dendra2, replacing Venus and Dendra2. Constructed Gateway<sup>®</sup>-compatible vectors for N- (pSAT3-cCFP-DEST, pSAT3-nVenus-DEST, pSAT3-nCerulean-DEST) and C-terminal (pSAT5-DEST-cCFP, pSAT5-DEST-nVenus, pSAT5-DEST-nCerulean) protein fusions were used in this study.

## Literature

- Goderis, I. and Bolle, M.De. (2002) A set of modular plant transformation vectors allowing flexible insertion of up to six expression units. *Plant Mol. Biol.* 50: 17–27.
- Tzfira, T., Tian, G.W., Lacroix, B., Vyas, S., Li, J., Leitner-Dagan, Y. et al. (2005) pSAT vectors: a modular series of plasmids for autofluorescent protein tagging and expression of multiple genes in plants. *Plant Mol. Biol.* 57: 503–516.
- Chakrabarty, R., Banerjee, R., Chung, S.M., Farman, M., Citovsky, V., Hogenhout, S. et al. (2007) pSITE vectors for stable integration or transient expression of autofluorescent protein fusions in plants: probing *Nicotiana benthamiana*-virus interactions. *Mol. Plant Mic. Inter.* 20: 740–750.
- Martin, K., Kopperud, K., Chakrabarty, R., Banerjee, R., Brooks, R. and Goodin, M.M. (2009) Transient expression in *Nicotiana benthamiana* fluorescent marker lines provides enhanced definition of protein localization, movement and interactions in planta. *Plant J.* 59: 150–62.

**Supplemental Table S1. Primers used in the study**

| <b>Name</b>  | <b>Primer sequence 5'-3'</b>         | <b>Description</b>                                         |
|--------------|--------------------------------------|------------------------------------------------------------|
| MEK18F       | CTTCTTGGGTTGGAGTACATTCAT             | For <i>mkkk18-2</i> genotyping                             |
| GKatTDNA     | ATATTGACCATCATACTCATTGC              | For <i>mkkk18-2</i> genotyping                             |
| M3K18 LP     | TTACCGGGTCGGATATTTAGG                | For <i>mkkk18-1</i> genotyping                             |
| M3K18 RP     | GAATGACTCATCAACATGGCC                | For <i>mkkk18-1</i> genotyping                             |
| LBb1.3       | ATTTTGCCGATTTTCGGAAC                 | For <i>mkkk18-1</i> genotyping                             |
| qMK18Fb      | TGCGCATTGCGACATTAAGG                 | qPCR analysis                                              |
| qMK18Rb      | AACCCACCGCCCATATATCACT               | qPCR analysis                                              |
| 18S-29For    | the same as in Ludwików et al., 2009 | qPCR analysis                                              |
| 18S-102Rev   | the same as in Ludwików et al., 2009 | qPCR analysis                                              |
| RAB18For     | the same as in Ludwików et al., 2009 | qPCR analysis                                              |
| RAB18Rev     | the same as in Ludwików et al., 2009 | qPCR analysis                                              |
| RD29BFor     | the same as in Fujii et al., 2007    | qPCR analysis                                              |
| RD29BRev     | the same as in Fujii et al., 2007    | qPCR analysis                                              |
| GtwMK18F     | CACCATGAATTGGACTAGAGGAAAAAC          | Cloning into pENTR/sd/d TOPO vector, Gateway primers       |
| GwMK18R      | CTAATTCCGTCGAACCGTGATCC              | Cloning into pENTR/sd/d TOPO vector, Gateway primers       |
| GMK18R-S     | ATTCCGTCGAACCGTGATCC                 | Cloning into pENTR/sd/d TOPO vector, Gateway primers       |
| M3k18K32MFor | CACTCGCCGTAATGTCCGCCGAGT             | Mutagenic primers, K32M substitution in ATP-binding domain |
| M3k18K32MRev | ACTCGGCGGACATTACGGCGAGTG             | Mutagenic primers, K32M substitution in ATP-binding domain |

|                 |                                      |                                                        |
|-----------------|--------------------------------------|--------------------------------------------------------|
| MK18T161EFa     | GGTTGAACCGGAAATAGAGGAACCGGTTAGAGGAAC | Mutagenic primers, T161E substitution in kinase domain |
| MK18T161ERa     | GTCCTCTAACCGGTTCTCTATTTCGGTTCAACC    | Mutagenic primers, T161E substitution in kinase domain |
| MKKK18fEcoRI    | GAATTCATGAATTGGACTAGAGGA             | Yeast two hybrid analysis                              |
| MAPKKK18rSacI   | GAGCTCCTAATTCCGTCGAACC               | Yeast two hybrid analysis                              |
| pMKKK18FHindIII | AAGCTTCAATAAGTTTCTTAATTAGCA          | For construction of MKKK18 promoter-GUS vector         |
| pMKKK18RBH      | GGATCCTTGGAGAATGATACTAAAA            | For construction of MKKK18 promoter-GUS vector         |

### Literature

- Fujii, H., Verslues, P.E. and Zhu, J.K. (2007) Identification of two protein kinases required for abscisic acid regulation of seed germination, root growth, and gene expression in *Arabidopsis*. *Plant Cell* 19: 485–494.
- Ludwikow, A., Kierzek, D., Gallois, P., Zeef, L., and Sadowski, J. (2009) Gene expression profiling of ozone-treated *Arabidopsis abiltd* insertional mutant: protein phosphatase 2C ABI1 modulates biosynthesis ratio of ABA and ethylene. *Planta*. 230: 1003-1017.
